# Supplementary material
Source: PubMed Central journal article supplement (PMC4382912)
Supplement: NIHMS623205-supplement-Supplemental_Material.pdf [file NIHMS623205-supplement-Supplemental_Material.pdf]

## SUPPLEMENTAL MATERIAL

**Supplemental Table 1: Hazard ratios (HRs) and 95 % confidence intervals (95% CI) for the multivariable and mediator adjusted association of risk of sudden cardiac death 1986-2012 with residential proximity to A1-A3 roads among Nurses' Health Study participants by active smoking status**

| Distance (m)               | Never Smokers |              |                     | Ever Smokers |              |                     |
|----------------------------|---------------|--------------|---------------------|--------------|--------------|---------------------|
|                            | Cases         | Person-Years | HR<br>(95%CI)*      | Cases        | Person-Years | HR<br>(95%CI)*      |
| 0-49                       | 33            | 153,559      | 1.22<br>(0.80-1.97) | 67           | 186,407      | 1.56<br>(1.08-2.23) |
| 50-199                     | 57            | 282,979      | 1.22<br>(0.80-1.87) | 89           | 352,552      | 1.17<br>(0.84-1.65) |
| 200-499                    | 60            | 329,767      | 1.25<br>(0.82-1.89) | 105          | 412,495      | 1.23<br>(0.89-1.70) |
| 500+                       | 39            | 265,689      | reference           | 58           | 310,025      | reference           |
| Linear (per 100m closer) § | 189           | 1,031,994    | 1.06<br>(0.97-1.15) | 319          | 1,261,479    | 1.07<br>(1.00-1.14) |
| p-for-interaction          |               |              |                     | 0.88         |              |                     |

\* Models adjusted for age, race, and calendar time, secondhand smoke exposure during childhood, at home, and at work, BMI, menopausal status and postmenopausal hormone use, the Alternative Healthy Eating Index, alcohol consumption, physical activity, family history of MI, aspirin, multivitamin, and vitamin E use, region of residence, and Census tract median home value and median income, incidence of diabetes or cancer, high cholesterol, high blood pressure, stroke, or coronary heart disease

§ Linear models for distances 0-499m, compared to addresses 500+m away

**Supplemental Table 2: Hazard ratios (HRs) and 95 % confidence intervals (95% CI) for the multivariable and mediator adjusted associations of the risk of nonfatal myocardial infarction (MI) and fatal coronary heart disease (CHD) 1986-2010 with residential proximity to A1-A3 roads among Nurses' Health Study participants by active smoking status**

| Outcome     | Distance (m)        | Cases | Never Smokers |                     | Ever Smokers |              |                     |
|-------------|---------------------|-------|---------------|---------------------|--------------|--------------|---------------------|
|             |                     |       | Person-Years  | HR (95%CI)*         | Cases        | Person-Years | HR (95%CI)*         |
| Nonfatal MI | 0-49                | 108   | 141,168       | 1.06<br>(0.84-1.20) | 162          | 171,856      | 1.10<br>(0.94-1.28) |
|             | 50-199              | 102   | 261,862       | 1.00<br>(0.84-1.20) | 166          | 326,017      | 1.13<br>(0.99-1.29) |
|             | 200-499             | 89    | 304,673       | 0.94<br>(0.78-1.12) | 150          | 381,281      | 1.08<br>(0.95-1.23) |
|             | 500+                | 92    | 241,918       | reference           | 131          | 282,346      | reference           |
|             | Linear (per 100m) § | 911   | 949,621       | 1.01<br>(0.98-1.05) | 1,762        | 1,161,499    | 1.02<br>(0.99-1.05) |
|             | p-for-interaction   |       |               |                     |              | 0.89         |                     |
| Fatal CHD   | 0-49                | 47    | 244,065       | 1.21<br>(0.85-1.72) | 145          | 174,848      | 1.37<br>(0.87-1.35) |
|             | 50-199              | 43    | 307,267       | 1.21<br>(0.89-1.65) | 201          | 331,579      | 1.09<br>(0.87-1.36) |
|             | 200-499             | 42    | 264,344       | 1.37<br>(1.01-1.85) | 200          | 386,787      | 0.96<br>(0.77-1.21) |
|             | 500+                | 28    | 142,672       | reference           | 132          | 286,390      | reference           |
|             | Linear (per 100m) § | 379   | 958,349       | 1.03<br>(0.97-1.09) | 678          | 1,179,603    | 1.07<br>(1.02-1.11) |
|             | p-for-interaction   |       |               |                     |              | 0.52         |                     |

\* Models adjusted for age, race, calendar time, secondhand smoke exposure during childhood, at home, and at work, BMI, menopausal status and postmenopausal hormone use, the Alternative Healthy Eating Index, alcohol consumption, physical activity, family history of MI, aspirin, multivitamin, and vitamin E use, region of residence, and Census tract median home value and median income, and incidence of diabetes, cancer, high cholesterol, high blood pressure, or stroke

§ Linear models for distances 0-499m, compared to addresses 500+m away
